# Supplementary material
Source: Springer Nature journal article supplement (https://www.springermedizin.de/resource/supplementary/12872_2013_697_MOESM4_ESM.pdf/9430692)

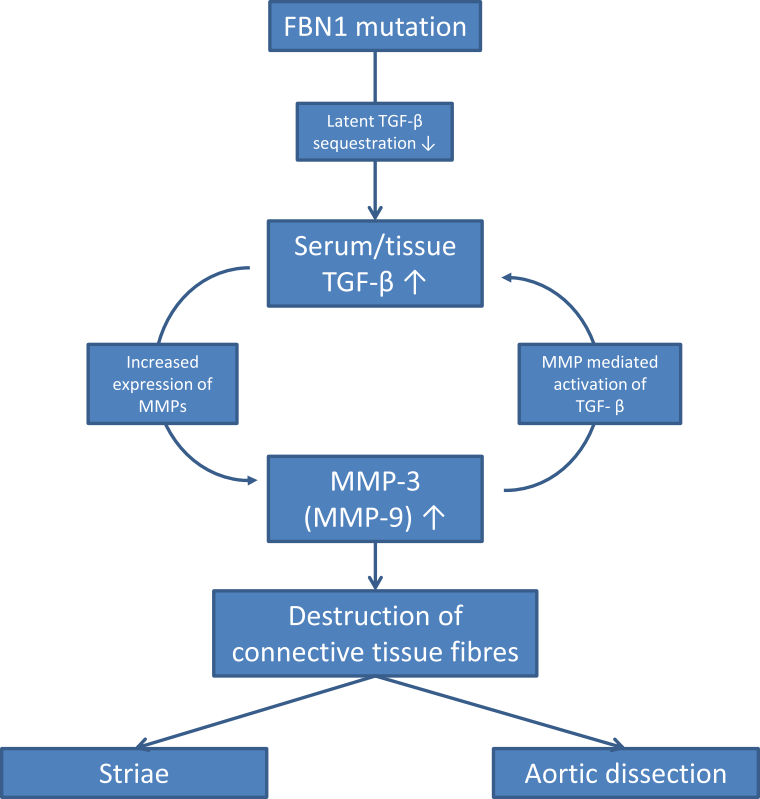

Supplement: MOESM4 [file 9430692]
